# Supplementary material
Source: Royal Society of Chemistry journal article supplement (doi:10.1039/d6fo00039h)

**Supplementary Figure 1.** (a-e) Relative expression levels of TNF- $\alpha$ , IL-6, IL-10, IL-12, and IL-1 $\beta$  in colon tissues. (f, g) Serum concentrations of TNF- $\alpha$  and IL-6.

**Supplementary Figure 2.** (a) KEGG pathway enrichment bubble plot of the gut microbiota. (b) Volcano plot of differentially abundant metabolites in the Old vs. Young comparison, identifying 235 significantly altered compounds (116 upregulated, 119 downregulated). (c, d) Heatmaps displaying the top 30 differentially abundant metabolites in the (c) Old vs. Young and (d) PSPA vs. Old comparisons. (e) KEGG pathway enrichment bubble plot of differential metabolites in the Old vs. Young comparison (screened by VIP > 1.0 and p < 0.05). (f) Correlation heatmap illustrating the associations between differential microbial taxa and differential metabolites.

**Supplementary Figure 3.** Both naturally aged colonic organoids and those treated in the continuous presence of 0.5 mM AAPH were co-treated with varying concentrations of PSPAs for 72 h. (a) Relative mRNA levels of Atg5, Atg10, Atg12, and Atg101. (b) Relative mRNA levels of Atg5, Atg10, Atg12, and Atg101.

**Supplementary Figure 4.** (a) Volcano plot of differentially expressed genes between Young and Old groups. (b) Heatmap of differentially expressed genes between Young and Old groups. (c) Venn diagram of differential genes among different comparisons. (d) Clustered heatmap of correlations between differential genes and differential metabolites.

**Table S1.** Nutritional composition table

|              | gm%  | kcal% |
|--------------|------|-------|
| Protein      | 14   | 15.2  |
| Fat          | 4    | 9.7   |
| Carbohydrate | 67.9 | 75.1  |
| Total        | -    | 100   |
| kcal/gm      | 3.81 | -     |

**Table S2.** Feed formula

| Ingredient               | gm       | kcal    |
|--------------------------|----------|---------|
| Casein, 30 Mesh          | 140      | 560     |
| L-Cystine                | 1.8      | 7.2     |
| Corn Starch              | 465.7    | 1862.82 |
| Maltodextrin             | 155      | 620     |
| Sucrose                  | 100      | 400     |
| Soybean Oil              | 40       | 360     |
| Cellulose                | 50       | 0       |
| Mineral Mix (AIN-93M-MX) | 35       | 0       |
| Vitamin Mix (AIN-93-VX)  | 10       | 40      |
| Choline Bitartrate       | 2.5      | 0       |
| Tert-Butylhydroquinone   | 0.008    | 0       |
| Total                    | 1000.008 | 3850.02 |

**Table S3.** Primers names and sequences.

| Primer        | Sequence(5'→3')                                          |
|---------------|----------------------------------------------------------|
| TNF- $\alpha$ | F: CACCATGAGCACAGAAAGCA<br>R: TAGACAGAAGAGCGTGGTGG       |
| Gapdh         | F: GCATGGCCTTCCGTGTTCCCTA<br>R: GATGCCTGCTTCACCACCTTCT   |
| Zo-1          | F: GGAGATGTTTATGCGGACGG<br>R: CCATTGCTGTGCTCTTAGCG       |
| Occludin      | F: TTGAAAGTCCACCTCCTTACAGA<br>R: CCGGATAAAAAGAGTACGCTGG  |
| Claudin-3     | F: GTACAAGACGAGACGGCCAA<br>R: CGTACAACCCAGCTCCCATC       |
| Muc2          | F: CTGACCAAGAGCGAACACAA<br>R: CATGACTGGAAGCAACTGGA       |
| Lgr5          | F: GAGTCAACCCAAGCCTTAGTATCC<br>R: CATGGGACAAATGCAACTGAAG |
| Ki67          | F: CAGTACTCGGAATGCAGCAA<br>R: CAGTCTTCAGGGGCTCTGTC       |
| ChgA          | F: CGATCCAGAAAGATGATGGTC<br>R: CGGAAGCCTCTGTCTTTCC       |
| Ccnd1         | F: AGGCGGATGAGAACAAGCAGAC<br>R: TGGAGGGTGGGTGGAAATGAAC   |
| Cdk4          | F: AGGACCTGAGGACATACCTGGAC<br>R: GCCGCTTAGAACTGACGCATTAG |
| Cdkn1a        | F: CGAGAACGGTGGAACCTTGACTTC<br>R: CGGGACCCAGGGCTCAGG     |
| Axin2         | F: GCAGGCTGGCAGAGGTGTC<br>R: CTTGGGTTGGCGAAGGGTGAG       |
| Atoh1         | F: CTTGCCGACTCGCTTCTCAG<br>R: TCTGTGCCATCATCGCTGTTAGG    |
| Atg5          | F: AAAGATGTGCTTCGAGATGTGT<br>R: CACTTTGTCAGTTACCAACGTCA  |
| Atg10         | F: CATCTCACCAGATCTCAAGAAGGA<br>R: CGACATGCGTAAGCAACGTT   |
| Atg12         | F: CTGCTGGCGACACCAAGAAA<br>R: CGTGTTGCTCTACTGCCC         |
| Atg101        | F: GGAGGTGTGGACTGTCAAGG<br>R: ACACGTTGTCCACCTCTGAC       |
| p16           | F: CGGTATCTACTCTCCTCCGC<br>R: GTTGCCAGAAGTGAAGCCAA       |
| P21           | F: TCCACAGCGATATCCAGACA<br>R: GGACATCACCAGATTGGAC        |

---

|              |                                                     |
|--------------|-----------------------------------------------------|
| IL-6         | F: TACCACTCCCAACAGACCTG<br>R: GGTACTCCAGAAACCAGAGG  |
| IL-10        | F: GAAGACCCTCAGGATGCG<br>R: CCAAGGAGTTGTTTCCGTTA    |
| IL-12        | F: AGTGACATGTGGAATGGCGT<br>R: CAGTTCAATGGGCAGGGTCT  |
| IL-1 $\beta$ | F: ACTCATTGTGGCTGTGGAGA<br>R: TTGTTTCATCTCGGAGCCTGT |

---

**Table S3.** Primers names and sequences (continued Table).

Supplementary Figure 1.

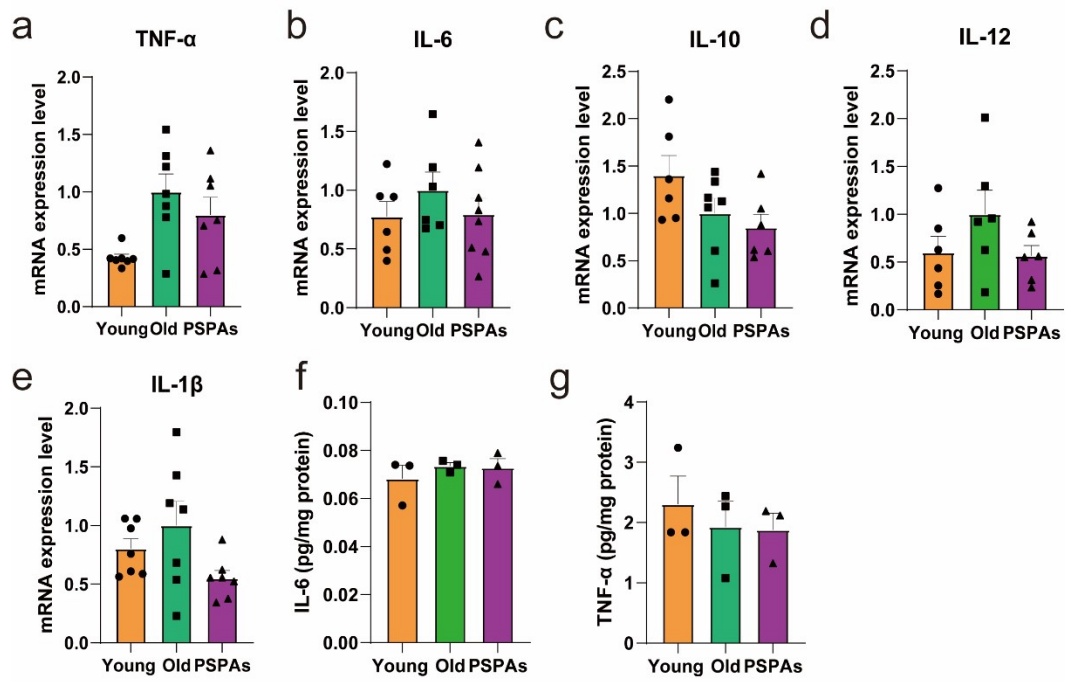



Supplementary Figure 3.

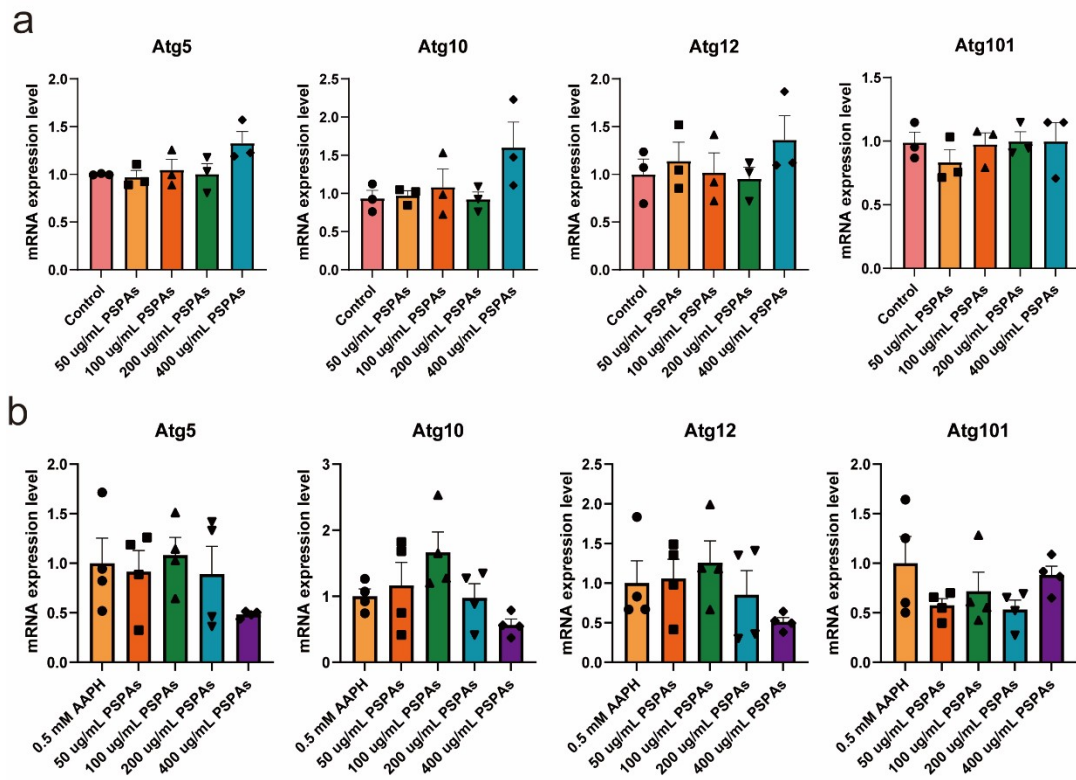

# Supplementary Figure 4.

a

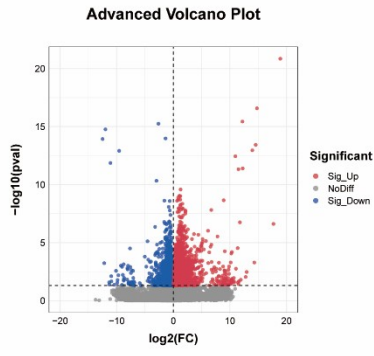

b

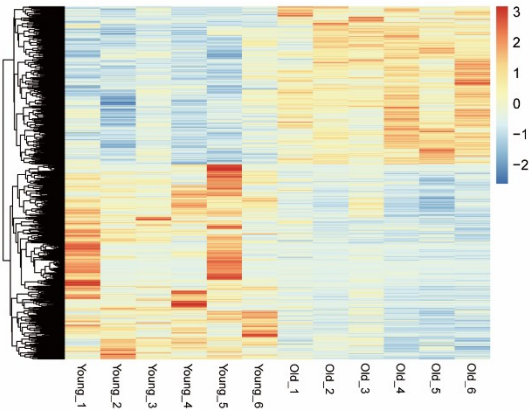

c

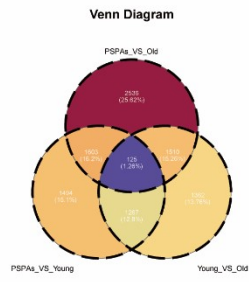

d

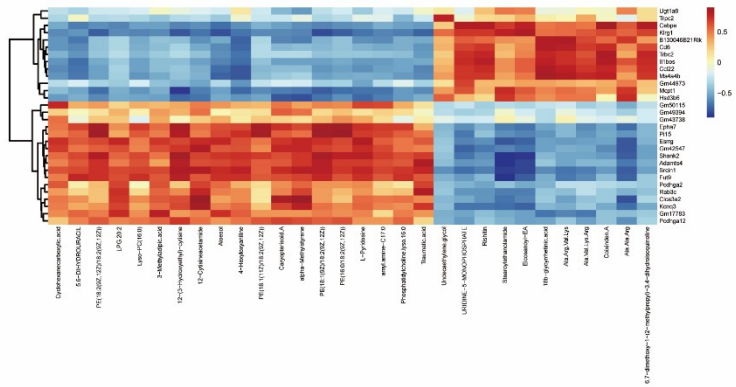

Supplement: d6fo00039h1.pdf [file d6fo00039h1.pdf]
