# Supplementary material
Source: Royal Society of Chemistry journal article supplement (doi:10.1039/d6fo00039h)

### Western blot and other electrophoresis data

**Figure 3**

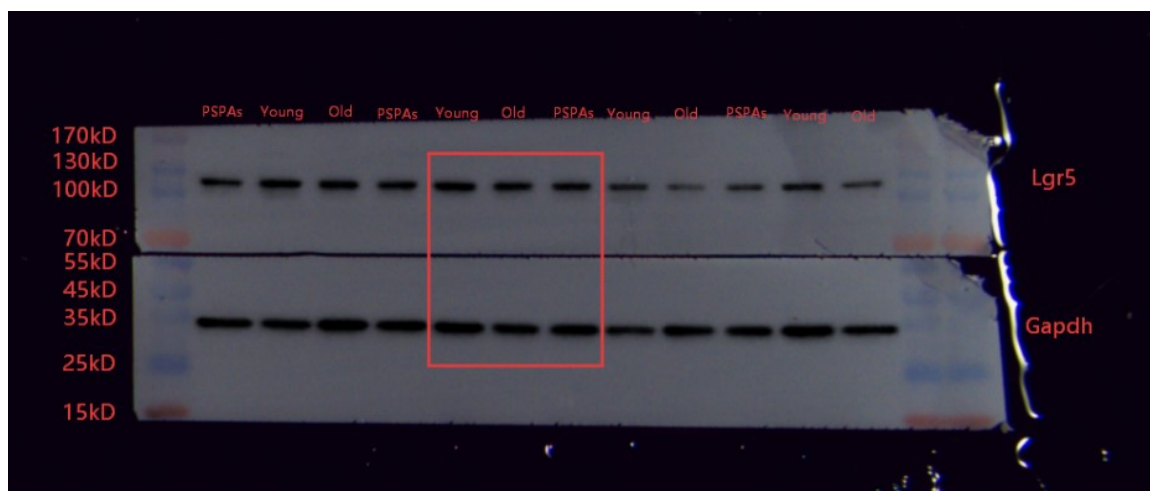

**Figure 6**

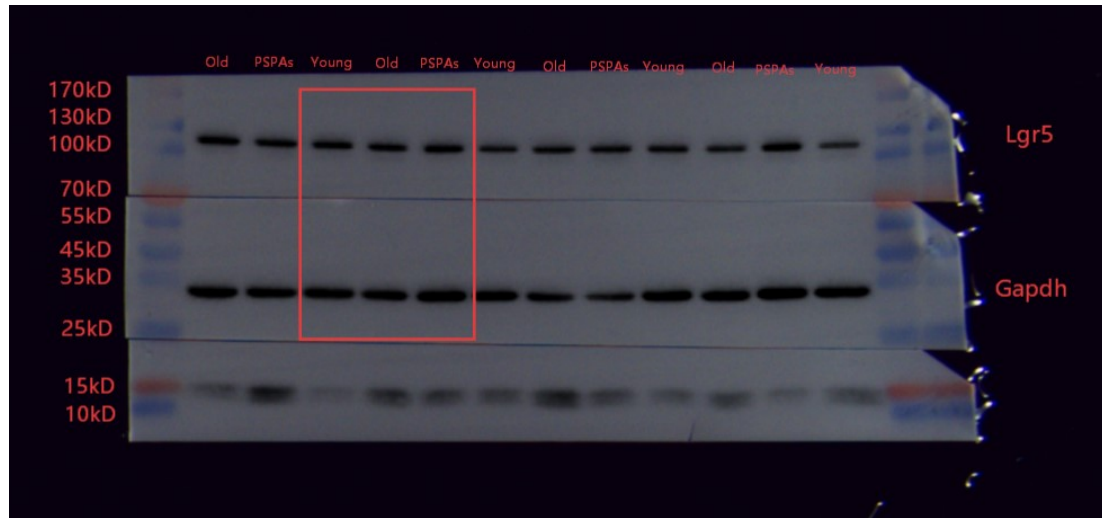

Supplement: d6fo00039h2.pdf [file d6fo00039h2.pdf]
